# Supplementary material for: Climatic Changes and Orogeneses in the Late Miocene of Eurasia: The Main Triggers of an Expansion at a Continental Scale?
Source: PubMed Central journal article supplement (PMC6167526; doi:10.3389/fpls.2018.01400), 2018-09-25
Supplement: Data_Sheet_1.pdf [file Data_Sheet_1.pdf]

## *Supplementary Material*

# **Climatic Changes and Orogeneses in the Late Miocene of Eurasia: the Main Triggers of an Expansion at a Continental Scale?**

Dong-Rui Jia<sup>1,2,3\*</sup> and Igor V. Bartish<sup>3\*</sup>

*<sup>1</sup>School of Ecology and Environmental Science & Yunnan Key Laboratory for Plateau Mountain Ecology and Restoration of Degraded Environments, Yunnan University, Kunming, China*

*<sup>2</sup>Department of Botany, Faculty of Science, Charles University in Prague, Prague, Czech Republic*

*<sup>3</sup>Department of Genetic Ecology, Institute of Botany, Academy of Sciences of the Czech Republic, Pruhonice, Czech Republic*

**\*Correspondence:**

Dong-Rui Jia, [jia.drui@ynu.edu.cn](mailto:jia.drui@ynu.edu.cn); Igor V. Bartish, [igor.bartish@ibot.cas.cz](mailto:igor.bartish@ibot.cas.cz)



**Table S1** (continued)

| Family                        | Genus              | 18S      | 26S      | <i>atpB</i> | <i>matK</i> | <i>ndhF</i> | <i>psbBTNH</i> | <i>rbcL</i> | <i>rpoC2</i> | <i>rps4</i> | <i>trnL-F</i> |
|-------------------------------|--------------------|----------|----------|-------------|-------------|-------------|----------------|-------------|--------------|-------------|---------------|
| <b>Rhamnaceae</b>             |                    |          |          |             |             |             |                |             |              |             |               |
|                               | <i>Ceanothus</i>   | U42799   | AF479102 | AF209558    | AF049815    | EU002210    | EU002393       | U06795      | EU002484     | EU002304    | HQ325601      |
|                               | <i>Gouania</i>     | JF317369 | JF317388 | JF317408    | JF317427    | JF317467    | JF317487       | JF317447    | JF317507     | –           | AJ390344      |
|                               | <i>Hovenia</i>     | JF317371 | JF317390 | JF317410    | JF317429    | JF317469    | JF317489       | JF317449    | JF317509     | JF317527    | AJ390343      |
|                               | <i>Rhamnus</i>     | JF317374 | JF317393 | JF317413    | JF317432    | JF317472    | JF317492       | JF317452    | JF317512     | JF317530    | AF348565      |
| <b>Rosaceae</b>               |                    |          |          |             |             |             |                |             |              |             |               |
|                               | <i>Dryas</i>       | JF317365 | JF317384 | JF317404    | JF317424    | JF317463    | JF317483       | JF317443    | JF317503     | JF317523    | DQ851231      |
|                               | <i>Filipendula</i> | JF317368 | JF317387 | JF317407    | AB073684    | JF317466    | JF317486       | JF317446    | JF317506     | –           | AJ416463      |
|                               | <i>Neillia</i>     | JF317372 | JF317391 | JF317411    | JF317430    | JF317470    | JF317490       | JF317450    | JF317510     | JF317528    | AF487228      |
|                               | <i>Sanguisorba</i> | JF317375 | JF317394 | JF317414    | JF317433    | JF317473    | JF317493       | JF317453    | JF317513     | JF317531    | AY634775      |
|                               | <i>Spiraea</i>     | U42801   | AF479103 | AJ235608    | AF288127    | EU002259    | EU002451       | L11206      | EU002541     | EU002362    | AF348571      |
| <b>Ulmaceae</b>               |                    |          |          |             |             |             |                |             |              |             |               |
|                               | <i>Ulmus</i>       | JF317377 | JF317396 | JF317416    | JF317435    | JF317475    | JF317495       | JF317455    | JF317515     | JF317533    | AF501593      |
|                               | <i>Zelkova</i>     | U42819   | AF479099 | AF209699    | AF345328    | EU002273    | EU002465       | AF206835    | EU002556     | –           | JX399109      |
| <b>Urticaceae</b>             |                    |          |          |             |             |             |                |             |              |             |               |
|                               | <i>Debregeasia</i> | JF317363 | JF317382 | JF317403    | JF317422    | JF317461    | JF317481       | JF317441    | JF317501     | JF317521    | JN040372      |
|                               | <i>Pilea</i>       | JF317373 | JF317392 | JF317412    | JF317431    | JF317471    | JF317491       | JF317451    | JF317511     | JF317529    | DQ179359      |
|                               | <i>Boehmeria</i>   | JF317378 | JF317397 | JF317417    | JF317436    | JF317476    | JF317496       | JF317456    | JF317516     | JF317534    | AY208722      |
| <b>Cucurbitales(Outgroup)</b> |                    |          |          |             |             |             |                |             |              |             |               |
| <b>Begoniaceae</b>            |                    |          |          |             |             |             |                |             |              |             |               |
|                               | <i>Begonia</i>     | AF008950 | AY968403 | AY968426    | AY968445    | EU002200    | EU002384       | L01888      | EU002475     | EU002294    | GU397135      |

Note: <sup>1</sup>*Elaeagnus bockii*; <sup>2</sup>*Elaeagnus angustifolia*; <sup>3</sup>*Elaeagnus umbellata*; <sup>4</sup>*Hippophae rhamnoides* subsp. *sinensis*; <sup>5</sup>*Hippophae tibetana*; <sup>6</sup>*Hippophae salicifolia*; <sup>7</sup>*Shepherdia argentea* and <sup>8</sup>*Shepherdia canadensis*.

**Table S2** Sequences of primers used for amplification and sequencing of DNA fragments from plastid and nuclear genomes of *Hippophae* L.

| Locus                                                   | Primer sequence 5'-3'                                               | Reference               |
|---------------------------------------------------------|---------------------------------------------------------------------|-------------------------|
| <i>trnC</i> <sup>GCA</sup> - <i>ycf6</i>                | F: CCAGTTCRAATCYGGGTG<br>R: GCCCAAGCRAGACTTACTATATCCAT              | (Shaw et al., 2005)     |
| <i>trnD</i> <sup>GUC</sup> - <i>trnT</i> <sup>GGU</sup> | F: ACCAATTGAACTACAATCCC<br>R: CTACCACTGAGTTAAAAGGG                  | (Demesure et al., 1995) |
| <i>trnL</i> <sup>UAA</sup> - <i>trnF</i> <sup>GAA</sup> | F: CGAAATCGGTAGACGCTACG<br>R: ATTTGAACTGGTGACACGAG                  | (Taberlet et al., 1991) |
| <i>trnS</i> <sup>UGA</sup> - <i>trnM</i> <sup>CAU</sup> | F: GAGAGAGAGGGATTTCGAACC<br>R: CATAACCTTGAGGTCACGGG                 | (Demesure et al., 1995) |
| <i>trnS</i> <sup>GCU</sup> - <i>trnG</i> <sup>UCC</sup> | F: GCCGCTTTAGTCCACTCAGC<br>R: GAACGAATCACACTTTTACCAC                | (Hamilton, 1999)        |
| <i>At103</i>                                            | F: CTTCAAGCCMAAGTTCATCTTCTA<br>R: TTGGCAATCATTGAGGTACATNGTMACATA    | (Li et al., 2008)       |
| <i>G3pdh</i>                                            | F: GATAGATTTGGAATTGTTGAGG<br>R: AAGCAATTCAGCCTTGG                   | (Strand et al., 1997)   |
| ITS                                                     | F: AGAAGTCGTAACAAGGTTTCCGTAGG<br>R: TCCTCCGCTTATTGATATGC            | (White et al., 1990)    |
| <i>Ms</i>                                               | F: GGAAGATGRTCATCAAYGCNCTYAAAYTC<br>R: GTCTTNACRTAGCTGAADATRTARTCCC | (Lewis and Doyle, 2001) |
| <i>Tpi</i>                                              | F: AAGGTCATTGCATGTGTTGG<br>R: CTTTACCAGTTCCAATAGCCC                 | (Strand et al., 1997)   |

**Table S3** Taxa, population codes and GenBank accession numbers for sequences used in analysis of *Hippophae* L.

| Taxon                                           | Population | <i>trnC-ycf6</i> | <i>trnD-T</i> | <i>trnL-F</i> | <i>trnS-fM</i> | <i>trnS-G</i> | <i>At103</i> | <i>G3pdh</i> | ITS      | <i>Ms</i> | <i>Tpi</i> |
|-------------------------------------------------|------------|------------------|---------------|---------------|----------------|---------------|--------------|--------------|----------|-----------|------------|
| <i>H. salicifolia</i>                           | 4079       | KF620857         | KF620916      | KF620652      | KF620729       | KF620763      | KF620838     | KF620955     | KF620619 | KF620691  | KF620799   |
|                                                 | 09XZ040    | KF620858         | KF620917      | KF620653      | KF620730       | KF620764      | KF620839     | KF620956     | KF620620 | KF620692  | KF620800   |
|                                                 | P          | KF620856         | KF620918      | KF620654      | KF620731       | KF620765      | KF620840     | KF620957     | KF620621 | –         | KF620801   |
| <i>H. gyantsensis</i>                           | 06252      | KF620847         | KF620886      | KF620627      | KF620699       | KF620738      | KF620808     | KF620925     | KF620594 | KF620661  | KF620769   |
|                                                 | 06217      | KF620848         | KF620887      | KF620628      | KF620700       | KF620739      | KF620809     | KF620926     | KF620595 | KF620662  | KF620770   |
|                                                 | 2568       | KF620849         | KF620888      | KF620629      | KF620701       | KF620740      | KF620810     | KF620927     | KF620596 | KF620663  | KF620771   |
| <i>H. neurocarpa</i><br><i>ssp. neurocarpa</i>  | YNG1       | KF620850         | KF620889      | KF620630      | KF620702       | KF620741      | KF620811     | KF620928     | KF620597 | KF620664  | KF620772   |
|                                                 | 1522       | KF620851         | KF620890      | KF620631      | KF620703       | KF620742      | KF620812     | KF620929     | KF620598 | KF620665  | KF620773   |
|                                                 | MM-31      | KF620852         | KF620891      | KF620632      | KF620704       | KF620743      | KF620813     | KF620930     | KF620599 | KF620666  | KF620774   |
| <i>ssp. stellatopilosa</i>                      | Ao129      | KF620853         | KF620892      | KF620633      | KF620705       | KF620744      | KF620814     | KF620931     | KF620600 | KF620667  | KF620775   |
|                                                 | QML1       | KF620854         | KF620893      | KF620634      | KF620706       | KF620745      | KF620815     | KF620932     | KF620601 | KF620668  | KF620776   |
|                                                 | Ao111      | KF620855         | KF620894      | KF620635      | KF620707       | KF620746      | KF620816     | KF620933     | KF620602 | KF620669  | KF620777   |
| <i>H. tibetana</i>                              | 07138      | KF620881         | KF620919      | KF620655      | KF620732       | KF620766      | KF620841     | KF620958     | KF620622 | KF620693  | KF620802   |
|                                                 | Henan      | KF620882         | KF620920      | KF620656      | KF620734       | KF620767      | KF620842     | KF620959     | KF620623 | KF620694  | KF620803   |
|                                                 | ST         | KF620880         | KF620921      | KF620657      | –              | KF620768      | KF620843     | KF620960     | KF620624 | KF620695  | KF620804   |
| <i>H. rhamnoides</i><br><i>ssp. yunnanensis</i> | 06309      | KF620877         | KF620913      | KF620649      | KF620726       | KF620755      | KF620835     | KF620952     | KF620616 | KF620688  | KF620796   |
|                                                 | 06321      | KF620878         | KF620914      | KF620650      | KF620727       | KF620761      | KF620836     | KF620953     | KF620617 | KF620689  | KF620797   |
|                                                 | 06324      | KF620879         | KF620915      | KF620651      | KF620728       | KF620762      | KF620837     | KF620954     | KF620618 | KF620690  | KF620798   |
| <i>ssp. sinensis</i>                            | Ao96       | KF620871         | KF620907      | KF620643      | KF620720       | KF620758      | KF620829     | KF620946     | KF620610 | KF620682  | KF620790   |
|                                                 | 05276      | KF620872         | KF620908      | KF620644      | KF620721       | KF620759      | KF620830     | KF620947     | KF620611 | KF620683  | KF620791   |
|                                                 | 05179      | KF620873         | KF620909      | KF620645      | KF620722       | KF620760      | KF620831     | KF620948     | KF620612 | KF620684  | KF620792   |

**Table S3** (continued)

| Taxon                      | Pop. code | <i>trnC-ycf6</i> | <i>trnD-T</i> | <i>trnL-F</i> | <i>trnS-fM</i> | <i>trnS-G</i> | <i>At103</i> | <i>G3pdh</i> | ITS      | <i>Ms</i> | <i>Tpi</i> |
|----------------------------|-----------|------------------|---------------|---------------|----------------|---------------|--------------|--------------|----------|-----------|------------|
| <i>H. rhamnoides</i>       |           |                  |               |               |                |               |              |              |          |           |            |
| <i>ssp. turkestanica</i>   | GL        | KF620875         | KF620910      | KF620646      | KF620723       | KF620751      | KF620832     | KF620949     | KF620613 | KF620685  | KF620793   |
|                            | SKZ       | KF620874         | KF620911      | KF620647      | KF620724       | KF620752      | KF620833     | KF620950     | KF620614 | KF620686  | KF620794   |
|                            | 12413     | KF620876         | KF620912      | KF620648      | KF620725       | KF620753      | KF620834     | KF620951     | KF620615 | KF620687  | KF620795   |
| <i>ssp. mongolica</i>      | 05047     | KF620869         | KF620903      | JQ289182      | KF620716       | JQ289198      | KF620825     | KF620942     | JQ289227 | KF620678  | KF620786   |
|                            | 6667      | KF620867         | KF620904      | KF620640      | KF620717       | KF620757      | KF620826     | KF620943     | KF620607 | KF620679  | KF620787   |
|                            | 6657      | KF620868         | KF620905      | KF620641      | KF620718       | KF620756      | KF620827     | KF620944     | KF620608 | KF620680  | KF620788   |
| <i>ssp. caucasica</i>      | 0402      | KF620861         | KF620897      | JQ663586      | KF620710       | JQ663592      | KF620819     | KF620936     | JQ663578 | KF620672  | KF620780   |
|                            | 21286     | KF620862         | KF620898      | KF620636      | KF620711       | KF620747      | KF620820     | KF620937     | KF620603 | KF620673  | KF620781   |
|                            | 9835      | KF620863         | KF620899      | KF620637      | KF620712       | KF620748      | KF620821     | KF620938     | KF620604 | KF620674  | KF620782   |
| <i>ssp. fluviatilis</i>    | SW1       | KF620866         | KF620900      | JQ289193      | KF620713       | JQ289217      | KF620822     | KF620939     | JQ289287 | KF620675  | KF620783   |
|                            | 6757      | KF620864         | KF620901      | KF620638      | KF620714       | KF620749      | KF620823     | KF620940     | KF620605 | KF620676  | KF620784   |
|                            | 6682      | KF620865         | KF620902      | KF620639      | KF620715       | KF620750      | KF620824     | KF620941     | KF620606 | KF620677  | KF620785   |
| <i>ssp. carpatica</i>      | 9897      | KF620859         | KF620895      | JQ663584      | KF620708       | JQ663591      | KF620817     | KF620934     | JQ663577 | KF620670  | KF620778   |
|                            | 9898      | KF620860         | KF620896      | JQ663585      | KF620709       | JQ663595      | KF620818     | KF620935     | JQ663576 | KF620671  | KF620779   |
| <i>ssp. rhamnoides</i>     | 6672      | KF620870         | KF620906      | KF620642      | KF620719       | KF620754      | KF620828     | KF620945     | KF620609 | KF620681  | KF620789   |
| <i>Elaeagnus triflora</i>  | IVB-29    | KF620844         | KF620883      | KF620625      | KF620696       | KF620735      | KF620805     | KF620922     | KF620592 | KF620658  | –          |
| <i>Elaeagnus umbellata</i> | 07078     | KF620845         | KF620884      | HM769678      | KF620697       | KF620736      | KF620806     | KF620923     | HM769715 | KF620659  | –          |
| <i>Shepherdia argentea</i> | 6777      | KF620846         | KF620885      | KF620626      | KF620698       | KF620737      | KF620807     | KF620924     | KF620593 | KF620660  | –          |
| <i>Rhamnus davurica</i>    | –         | –                | –             | AY626420      | –              | –             | –            | –            | AY626441 | –         | –          |

**Table S4** Fossils used for calibration of phylogenetic trees of Rosales and *Hippophae* in dating analyses (see Supplementary Figure S2 and Figure 2). Absolute ages in Ma used for calibration were determined as the minimum age of each geological stratum relying on the Geological Time Scale v.4.0 (Walker et al., 2012). Assignments of fossils to extant taxa are <sup>a)</sup>“intuitive“ or <sup>b)</sup>“apomorphy-based“, as specified by Sauquet *et al.* (2012). <sup>c)</sup>The fossil record was used to calibrate the stem node of a monophyletic group of four western subspecies within *H. rhamnoides* (Jia et al., 2012).

| Fossil | Taxon name                                          | Family                     | Fossil organ   | Locality            | Region              | Geological age | Absolute age (Ma) |
|--------|-----------------------------------------------------|----------------------------|----------------|---------------------|---------------------|----------------|-------------------|
| 1      | <i>Triorites minutipori</i> Muller                  | Ulmaceae <sup>a)</sup>     | pollen         | Sarawak             | South-eastern Asia  | Turonian       | 89.8              |
| 2      | <i>Celtis aspera</i> Manchester, Akhmetiev & Kodrul | Cannabaceae <sup>b)</sup>  | fruits, leaves | Numerous localities | North America; Asia | Paleocene      | 56                |
| 3      | <i>Ficus</i> L.                                     | Moraceae <sup>a)</sup>     | fruit          | Lower Bagshot       | Dorset, England     | Ypresian       | 47.8              |
| 4      | <i>Paliurus clarnensis</i> Burge & Manchester       | Rhamnaceae <sup>b)</sup>   | fruit          | Red Gap, Jefferson  | Oregon, USA         | Lutetian       | 41.2              |
| 5      | <i>Shepherdia weaveri</i> Becker                    | Elaeagnaceae <sup>a)</sup> | leaves         | Mormon Creek        | Montana, USA        | Priabonian     | 33.9              |
| 6      | <i>Hippophae rhamnoides</i> L.                      | Elaeagnaceae <sup>c)</sup> | pollen         | Burhanli            | Marmor sea, Turkey  | Tortonian      | 7.2               |

**Table S5** Gene/partition characteristics of the Rosales dataset.

| Partition      | No. of taxa | Aligned length | Variable sites | Parsimony-informative sites | Model selected by AIC |
|----------------|-------------|----------------|----------------|-----------------------------|-----------------------|
| 18S rDNA       | 28          | 1733           | 202            | 101                         | GTR + I + G           |
| 26S rDNA       | 27          | 3256           | 494            | 277                         | GTR + I + G           |
| <i>atpB</i>    | 26          | 1242           | 286            | 169                         | TIM1 + I + G          |
| <i>matK</i>    | 30          | 1029           | 535            | 333                         | TVM + I + G           |
| <i>ndhF</i>    | 26          | 2116           | 924            | 592                         | GTR + I + G           |
| <i>psbBTNH</i> | 26          | 2278           | 598            | 354                         | TVM + I + G           |
| <i>rbcL</i>    | 32          | 1289           | 315            | 195                         | GTR + I + G           |
| <i>rpoC2</i>   | 26          | 3876           | 1547           | 908                         | GTR + I + G           |
| <i>rps4</i>    | 23          | 546            | 164            | 79                          | GTR + G               |
| <i>trnL-F</i>  | 31          | 970            | 502            | 311                         | GTR + I + G           |
| Total          | 32          | 18335          | 5567           | 3319                        |                       |



**Table S6** Gene/partition characteristics of the *Hippophae* L. datasets.

| Data set    | Partition        | No. of Taxa | Aligned lengths | Variable sites | Parsimony-informative sites | Model selected by AIC |
|-------------|------------------|-------------|-----------------|----------------|-----------------------------|-----------------------|
| cpDNA       |                  |             |                 |                |                             |                       |
|             | <i>trnC-ycf6</i> | 39          | 928             | 129            | 96                          | TPM1uf + G            |
|             | <i>trnD-T</i>    | 39          | 1396            | 144            | 99                          | TPM1uf + I + G        |
|             | <i>trnL-F</i>    | 40          | 959             | 198            | 54                          | TIM1 + G              |
|             | <i>trnS-fM</i>   | 38          | 1441            | 187            | 133                         | TIM1 + G              |
|             | <i>trnS-G</i>    | 39          | 738             | 88             | 60                          | TrN + G               |
|             | Total            | 40          | 5462            | 746            | 442                         |                       |
| nuclear DNA |                  |             |                 |                |                             |                       |
|             | <i>At103</i>     | 39          | 524             | 65             | 46                          | HKY + I               |
|             | <i>G3pdh</i>     | 39          | 735             | 42             | 29                          | HKY + I               |
|             | ITS              | 40          | 714             | 276            | 174                         | GTR + I               |
|             | <i>Ms</i>        | 38          | 610             | 69             | 53                          | TPM1uf + G            |
|             | <i>Tpi</i>       | 36          | 375             | 40             | 22                          | TPM3uf + I            |
|             | Total            | 40          | 2958            | 492            | 324                         |                       |

**Table S7** Divergence time estimates of diversifications among and within families of Rosales. Ranges on PL divergence time represent  $\pm 1$  standard deviation of the mean based on 1000 bootstrap replicates; while ranges on Bayesian estimates represent 95% confidence limits around mean age estimates. All ages are millions of years.

| Node                              | Age   |                 |                |                 |              |                 |
|-----------------------------------|-------|-----------------|----------------|-----------------|--------------|-----------------|
|                                   | PL    |                 | UCLN-lognormal |                 | UCLN-uniform |                 |
| Rosales <sub>crow</sub>           | 103   | (102.84–103.15) | 102.53         | (101.66–103.00) | 102.56       | (101.69–103.00) |
| Rosaceae <sub>crow</sub>          | 75.93 | (72.71–77.63)   | 69.26          | (61.43–77.18)   | 69.83        | (61.50–77.78)   |
| Subclades split                   | 96.22 | (95.60–96.89)   | 95.96          | (94.22–97.73)   | 96.13        | (94.33–97.93)   |
| Ulmaceae <sub>stem</sub>          | 89.80 | (89.58–90.27)   | 90.45          | (89.84–91.40)   | 90.64        | (89.80–92.03)   |
| Ulmaceae <sub>crow</sub>          | 7.34  | (5.69–9.23)     | 6.92           | (4.53–9.46)     | 6.89         | (4.67–9.46)     |
| Canabaceae <sub>stem</sub>        | 76.26 | (75.38–77.32)   | 76.40          | (73.30–79.48)   | 76.43        | (72.62–79.74)   |
| Canabaceae <sub>crow</sub>        | 58.52 | (57.04–60.36)   | 57.11          | (56.04–59.10)   | 58.47        | (56.62–62.35)   |
| Moraceae <sub>stem</sub>          | 73.69 | (72.76–74.74)   | 73.53          | (70.12–76.92)   | 73.56        | (69.97–77.15)   |
| Urticaceae <sub>crow</sub>        | 56.55 | (55.13–58.24)   | 55.42          | (49.90–60.82)   | 55.55        | (49.82–60.87)   |
| Moraceae <sub>crow</sub>          | 55.71 | (54.77–56.62)   | 56.14          | (53.53–58.97)   | 56.32        | (53.43–59.05)   |
| Rhamnaceae <sub>stem</sub>        | 93.22 | (92.52–94.18)   | 91.09          | (87.52–93.98)   | 91.34        | (88.33–94.16)   |
| Rhamnaceae <sub>crow</sub>        | 77.52 | (75.72–79.01)   | 76.15          | (70.07–82.42)   | 76.46        | (70.49–82.32)   |
| Elaeagnaceae <sub>stem</sub>      | 92.25 | (91.13–93.06)   | 89.25          | (85.72–92.97)   | 89.52        | (86.26–92.94)   |
| Barbeyaceae <sub>stem</sub>       | 86.61 | (84.14–88.07)   | 82.81          | (77.16–87.88)   | 83.16        | (77.75–88.14)   |
| Elaeagnaceae <sub>crow</sub>      | 42.19 | (40.94–43.79)   | 40.62          | (36.94–44.04)   | 40.67        | (37.61–44.12)   |
| <i>Elaeagnus</i> <sub>crow</sub>  | 20.54 | (18.13–23.98)   | 15.68          | (8.85–23.47)    | 15.51        | (8.75–23.04)    |
| <i>Shepherdia</i> <sub>stem</sub> | 33.90 | (33.27–34.57)   | 34.38          | (33.93–35.07)   | 34.40        | (33.90–35.43)   |
| <i>Shepherdia</i> <sub>crow</sub> | 19.76 | (16.11–24.43)   | 12.31          | (2.73–29.51)    | 10.89        | (2.69–28.05)    |
| <i>Hippophae</i> <sub>crow</sub>  | 19.53 | (16.51–23.15)   | 8.30           | (4.24–12.76)    | 8.21         | (4.11–12.80)    |

**Table S8** Ancestral area reconstructions (AAR) and divergence time estimates of *Hippophae* L. based on cpDNA data. Ancestral areas were constructed using Bayesian dispersal-vicariance (Bayes-DIVA) and dispersal-extinction-cladogenesis (DEC) models both implemented in RASP. The first two reconstructions with the highest probability are presented, and the marginal probability (MP; for Bayes-DIVA model) and relative probability (RP; for DEC model) for each reconstruction is given. Estimated ages are millions of years and represent results of three different analyses: Penalised Likelihood (PL), Bayesian UCLN-lognormal and Bayesian UCLN-uniform. Ranges on PL divergence time represent  $\pm 1$  standard deviation of the mean based on 1000 bootstrap replicates; while ranges on Bayesian estimates represent 95% confidence limits around mean age estimates. BEAST posterior probabilities (PP) are also provided for each node. Codes of areas follow Fig. 3.

| Node                                         | PP   | Bayes-DIVA model |       |    |       | DEC model |      |    |      | Dating |                |       |               |       |               |
|----------------------------------------------|------|------------------|-------|----|-------|-----------|------|----|------|--------|----------------|-------|---------------|-------|---------------|
|                                              |      | 1                | MP    | 2  | MP    | 1         | RP   | 2  | RP   | PL     | UCLN-lognormal |       | UCLN-uniform  |       |               |
| <i>Hippophae</i> <sub>stem</sub>             | 1.00 | A                | 68.82 | B  | 17.61 | A         | 0.26 | B  | 0.15 | 33.90  | (32.88–35.91)  | 34.88 | (33.93–36.58) | 35.94 | (33.90–39.37) |
| <i>Hippophae</i> <sub>crowns</sub>           | 1.00 | A                | 81.07 | B  | 11.19 | AB        | 0.35 | A  | 0.30 | 18.77  | (17.72–22.82)  | 21.20 | (18.30–24.00) | 21.57 | (18.38–25.00) |
| <i>H. gyantsensis</i> <sub>stem</sub>        | 1.00 | A                | 89.79 | AB | 5.64  | A         | 0.70 | AB | 0.17 | 17.82  | (15.09–22.99)  | 19.70 | (16.73–22.63) | 20.03 | (16.69–23.44) |
| <i>H. gyantsensis</i> <sub>crowns</sub>      | 1.00 | A                | 99.34 | AD | 0.29  | A         | 1.00 | –  | –    | 1.93   | (0.47–4.35)    | 2.46  | (1.18–3.82)   | 2.51  | (1.15–3.94)   |
| <i>H. salicifolia</i> <sub>stem</sub>        | 1.00 | A                | 67.04 | B  | 14.96 | A         | 0.45 | AB | 0.22 | 16.85  | (14.16–21.92)  | 17.57 | (14.49–20.52) | 17.89 | (14.55–21.20) |
| <i>H. salicifolia</i> <sub>crowns</sub>      | 1.00 | A                | 75.89 | AD | 10.95 | AD        | 1.00 | –  | –    | 3.61   | (2.41–5.51)    | 2.54  | (1.24–4.01)   | 2.57  | (1.20–4.10)   |
| <i>H. neurocarpa</i> <sub>crowns</sub>       | 1.00 | B                | 87.37 | AB | 4.32  | BC        | 0.53 | B  | 0.47 | 3.55   | (2.51–5.49)    | 4.36  | (2.86–5.88)   | 4.40  | (2.93–6.05)   |
| <i>ssp. stellatopilosa</i> <sub>crowns</sub> | 0.94 | B                | 95.00 | BC | 3.72  | B         | 0.79 | BC | 0.21 | 3.07   | (1.96–4.75)    | 3.62  | (2.22–5.17)   | 3.66  | (2.18–5.14)   |
| <i>ssp. neurocarpa</i> <sub>crowns</sub>     | 1.00 | B                | 79.00 | BC | 11.70 | BC        | 1.00 | –  | –    | 0.34   | (0.00–1.16)    | 0.71  | (0.17–1.27)   | 0.73  | (0.16–1.34)   |
| <i>H. tibetana</i> <sub>stem</sub>           | 1.00 | A                | 52.74 | B  | 31.81 | AB        | 0.34 | A  | 0.21 | 16.65  | (13.43–22.51)  | 18.43 | (15.72–21.46) | 18.75 | (15.66–22.01) |
| <i>H. tibetana</i> <sub>crowns</sub>         | 1.00 | A                | 86.42 | B  | 2.84  | AD        | 0.54 | AC | 0.46 | 2.99   | (1.62–5.23)    | 3.63  | (2.15–5.31)   | 3.70  | (2.12–5.32)   |
| <i>H. rhamnoides</i> <sub>crowns</sub>       | 1.00 | B                | 96.69 | AB | 2.64  | B         | 0.64 | AB | 0.19 | 11.43  | (9.93–14.76)   | 12.91 | (10.72–15.19) | 13.07 | (10.69–15.62) |
| East/West QTP split                          | 0.91 | B                | 94.35 | BD | 1.36  | B         | 0.44 | BD | 0.27 | 7.99   | (7.02–9.67)    | 8.81  | (7.82–9.96)   | 8.86  | (7.76–10.16)  |
| <i>ssp. mongolica</i> <sub>stem</sub>        | 1.00 | B                | 88.47 | BF | 6.66  | BF        | 1.00 | –  | –    | 2.69   | (1.63–4.53)    | 3.66  | (2.36–5.14)   | 3.70  | (2.27–5.14)   |

**Table S8** (continued)

| Node                                     | PP   | Bayes-DIVA model |       |    |       | DEC model |      |    |      | Dating |                |  |              |             |  |      |             |  |
|------------------------------------------|------|------------------|-------|----|-------|-----------|------|----|------|--------|----------------|--|--------------|-------------|--|------|-------------|--|
|                                          |      | 1                | MP    | 2  | MP    | 1         | RP   | 2  | RP   | PL     | UCLN-lognormal |  | UCLN-uniform |             |  |      |             |  |
| <i>ssp. mongolica</i> <sub>crow</sub>    | 1.00 | F                | 93.28 | BF | 5.55  | F         | 1.00 | –  | –    | 1.16   | (0.49–2.11)    |  | 1.63         | (0.77–2.60) |  | 1.63 | (0.75–2.54) |  |
| <i>ssp. sinensis</i> <sub>crow</sub>     | 1.00 | B                | 93.34 | BE | 4.66  | BE        | 1.00 | –  | –    | 0.72   | (0.00–1.55)    |  | 1.10         | (0.34–2.03) |  | 1.10 | (0.30–2.01) |  |
| <i>ssp. turkestanica</i> <sub>stem</sub> | 1.00 | D                | 53.60 | B  | 27.29 | B         | 0.16 | D  | 0.14 | 7.20   | (6.44–8.44)    |  | 7.65         | (7.23–8.23) |  | 7.66 | (7.20–8.46) |  |
| <i>ssp. turkestanica</i> <sub>crow</sub> | 1.00 | D                | 99.11 | BD | 0.32  | D         | 0.87 | BD | 0.13 | 2.92   | (2.08–4.25)    |  | 3.44         | (2.09–4.82) |  | 3.48 | (2.18–4.91) |  |
| <i>ssp. caucasica</i> <sub>stem</sub>    | 1.00 | G                | 69.90 | I  | 7.44  | GH        | 0.16 | GI | 0.15 | 5.24   | (4.54–6.51)    |  | 5.84         | (4.67–7.11) |  | 5.84 | (4.49–7.09) |  |
| <i>ssp. caucasica</i> <sub>crow</sub>    | 1.00 | G                | 99.44 | GH | 0.12  | G         | 1.00 | –  | –    | 1.77   | (1.09–2.74)    |  | 2.07         | (1.08–3.15) |  | 2.10 | (1.09–3.21) |  |
| <i>ssp. fluviatilis</i> <sub>stem</sub>  | 1.00 | H                | 44.15 | I  | 37.41 | HI        | 0.38 | H  | 0.20 | 4.39   | (3.50–5.43)    |  | 4.58         | (3.20–6.02) |  | 4.59 | (3.20–6.11) |  |
| <i>ssp. fluviatilis</i> <sub>crow</sub>  | 1.00 | I                | 98.58 | HI | 1.04  | I         | 1.00 | –  | –    | 0.53   | (0.17–1.04)    |  | 0.91         | (0.24–1.69) |  | 0.90 | (0.26–1.69) |  |
| <i>ssp. carpatica</i> <sub>stem</sub>    | 1.00 | H                | 98.89 | HI | 0.56  | H         | 1.00 | –  | –    | 0.89   | (0.28–1.43)    |  | 1.09         | (0.35–1.95) |  | 1.09 | (0.35–1.95) |  |
| <i>ssp. carpatica</i> <sub>crow</sub>    | 1.00 | H                | 99.70 | GH | 0.08  | H         | 1.00 | –  | –    | 0.03   | (0.00–0.21)    |  | 0.20         | (0.00–0.60) |  | 0.21 | (0.00–0.62) |  |

**Table S9** Ancestral area reconstructions (AAR) and divergence time estimates of *Hippophae* L. based on nDNA data. Ancestral areas were constructed using Bayesian dispersal-vicariance (Bayes-DIVA) and dispersal-extinction-cladogenesis (DEC) models both implemented in RASP. The first two reconstructions with the highest probability are presented, and the marginal probability (MP; for Bayes-DIVA model) and relative probability (RP; for DEC model) for each reconstruction is given. Estimated ages are millions of years and represent results of three different analyses: Penalised Likelihood (PL), Bayesian UCLN-lognormal and Bayesian UCLN-uniform. Ranges on PL divergence time represent  $\pm 1$  standard deviation of the mean based on 1000 bootstrap replicates; while ranges on Bayesian estimates represent 95% confidence limits around mean age estimates. BEAST posterior probabilities (PP) are also provided for each node. Codes of areas follow Fig. 3.

| Node                                         | PP   | Bayes-DIVA model |       |    |       | DEC model |      |    |      | Dating |                |       |               |       |               |
|----------------------------------------------|------|------------------|-------|----|-------|-----------|------|----|------|--------|----------------|-------|---------------|-------|---------------|
|                                              |      | 1                | MP    | 2  | MP    | 1         | RP   | 2  | RP   | PL     | UCLN-lognormal |       | UCLN-uniform  |       |               |
| <i>Hippophae</i> <sub>stem</sub>             | 1.00 | A                | 51.33 | B  | 24.27 | A         | 0.27 | B  | 0.19 | 33.90  | (33.01–35.30)  | 35.08 | (33.94–37.21) | 36.50 | (33.90–39.77) |
| <i>Hippophae</i> <sub>crowns</sub>           | 1.00 | A                | 58.67 | B  | 27.13 | AB        | 0.23 | A  | 0.19 | 18.63  | (16.37–22.72)  | 22.85 | (17.10–28.41) | 23.03 | (17.29–29.23) |
| <i>H. gyantsensis</i> <sub>stem</sub>        | 1.00 | A                | 78.51 | AB | 7.57  | AB        | 0.43 | AC | 0.35 | 7.57   | (5.35–11.28)   | 11.55 | (6.07–17.68)  | 11.32 | (6.03–17.14)  |
| <i>H. gyantsensis</i> <sub>crowns</sub>      | 1.00 | A                | 99.32 | *  | 0.68  | A         | 1.00 | –  | –    | 2.08   | (0.81–4.43)    | 3.77  | (1.02–7.05)   | 3.95  | (1.21–7.33)   |
| <i>H. salicifolia</i> <sub>stem</sub>        | 1.00 | A                | 86.56 | *  | 13.44 | A         | 0.34 | AB | 0.24 | 9.77   | (7.43–14.17)   | 15.56 | (9.00–22.40)  | 15.12 | (8.80–21.71)  |
| <i>H. salicifolia</i> <sub>crowns</sub>      | 1.00 | A                | 81.58 | AD | 9.07  | AD        | 1.00 | –  | –    | 2.57   | (0.14–6.58)    | 2.28  | (0.18–5.51)   | 1.97  | (0.14–4.66)   |
| <i>H. neurocarpa</i> <sub>crowns</sub>       | 1.00 | B                | 41.67 | C  | 30.27 | BC        | 0.77 | B  | 0.12 | 1.00   | (0.00–3.60)    | 2.93  | (0.84–5.71)   | 2.65  | (0.65–5.13)   |
| <i>ssp. stellatopilosa</i> <sub>crowns</sub> | –    | –                | –     | –  | –     | –         | –    | –  | –    | –      | –              | –     | –             | –     | –             |
| <i>ssp. neurocarpa</i> <sub>crowns</sub>     | –    | –                | –     | –  | –     | –         | –    | –  | –    | –      | –              | –     | –             | –     | –             |
| <i>H. tibetana</i> <sub>stem</sub>           | 1.00 | B                | 65.25 | A  | 16.89 | AB        | 0.22 | A  | 0.14 | 16.93  | (14.01–20.35)  | 18.86 | (13.65–24.49) | 19.48 | (14.00–25.23) |
| <i>H. tibetana</i> <sub>crowns</sub>         | 1.00 | C                | 53.04 | A  | 20.82 | AC        | 0.42 | CD | 0.32 | 5.06   | (2.80–8.57)    | 6.61  | (2.33–11.85)  | 6.40  | (2.44–11.26)  |
| <i>H. rhamnoides</i> <sub>crowns</sub>       | 1.00 | B                | 98.05 | *  | 1.95  | B         | 0.65 | BD | 0.22 | 9.70   | (7.74–12.75)   | 12.60 | (9.45–16.39)  | 12.54 | (9.02–16.27)  |
| East/West QTP split                          | 0.39 | B                | 58.29 | E  | 25.59 | B         | 0.49 | BD | 0.28 | 8.50   | (7.05–11.24)   | 10.15 | (7.98–12.61)  | 10.16 | (7.90–12.82)  |
| <i>ssp. mongolica</i> <sub>stem</sub>        | 1.00 | D                | 95.39 | *  | 4.61  | DF        | 1.00 | –  | –    | 0.69   | (0.00–1.76)    | 1.32  | (0.19–2.78)   | 1.32  | (0.23–2.72)   |

**Table S9** (continued)

| Node                                               | PP   | Bayes-DIVA model |       |    |       | DEC model |      |    |      | Dating |                |      |              |      |             |
|----------------------------------------------------|------|------------------|-------|----|-------|-----------|------|----|------|--------|----------------|------|--------------|------|-------------|
|                                                    |      | 1                | MP    | 2  | MP    | 1         | RP   | 2  | RP   | PL     | UCLN-lognormal |      | UCLN-uniform |      |             |
| <i>ssp. mongolica</i> <sub>crow</sub>              | 1.00 | F                | 93.52 | *  | 5.45  | F         | 1.00 | –  | –    | 0.03   | (0.00–0.49)    | 0.43 | (0.01–1.13)  | 0.42 | (0.01–1.12) |
| <i>ssp. sinensis</i> <sub>crow</sub>               | 1.00 | E                | 84.52 | BE | 11.18 | BE        | 1.00 | –  | –    | 0.51   | (0.00–2.46)    | 1.05 | (0.07–2.70)  | 0.95 | (0.03–2.47) |
| <i>ssp. turkestanica+mongolica</i> <sub>stem</sub> | 1.00 | D                | 61.11 | B  | 9.68  | BD        | 0.13 | DI | 0.12 | 7.20   | (6.05–9.03)    | 7.86 | (7.24–8.88)  | 8.00 | (7.20–9.55) |
| <i>ssp. turkestanica</i> <sub>crow</sub>           | –    | –                | –     | –  | –     | –         | –    | –  | –    | –      | –              | –    | –            | –    | –           |
| <i>ssp. caucasica</i> <sub>stem</sub>              | –    | –                | –     | –  | –     | –         | –    | –  | –    | –      | –              | –    | –            | –    | –           |
| <i>ssp. caucasica</i> <sub>crow</sub>              | –    | –                | –     | –  | –     | –         | –    | –  | –    | –      | –              | –    | –            | –    | –           |
| <i>ssp. fluviatilis</i> <sub>stem</sub>            | 1.00 | I                | 45.54 | G  | 36.23 | GI        | 0.40 | HI | 0.18 | 4.67   | (3.38–6.28)    | 5.28 | (3.08–7.63)  | 5.29 | (2.85–7.62) |
| <i>ssp. fluviatilis</i> <sub>crow</sub>            | 1.00 | I                | 99.15 | *  | 0.85  | I         | 1.00 | –  | –    | 0.68   | (0.00–1.90)    | 1.51 | (0.22–3.24)  | 1.45 | (0.23–3.07) |
| <i>ssp. carpatica</i> <sub>stem</sub>              | –    | –                | –     | –  | –     | –         | –    | –  | –    | –      | –              | –    | –            | –    | –           |
| <i>ssp. carpatica</i> <sub>crow</sub>              | –    | –                | –     | –  | –     | –         | –    | –  | –    | –      | –              | –    | –            | –    | –           |

Asterisk (\*) represent reconstructions with marginal probability values less than 5%.

## 2 Supplementary Figures

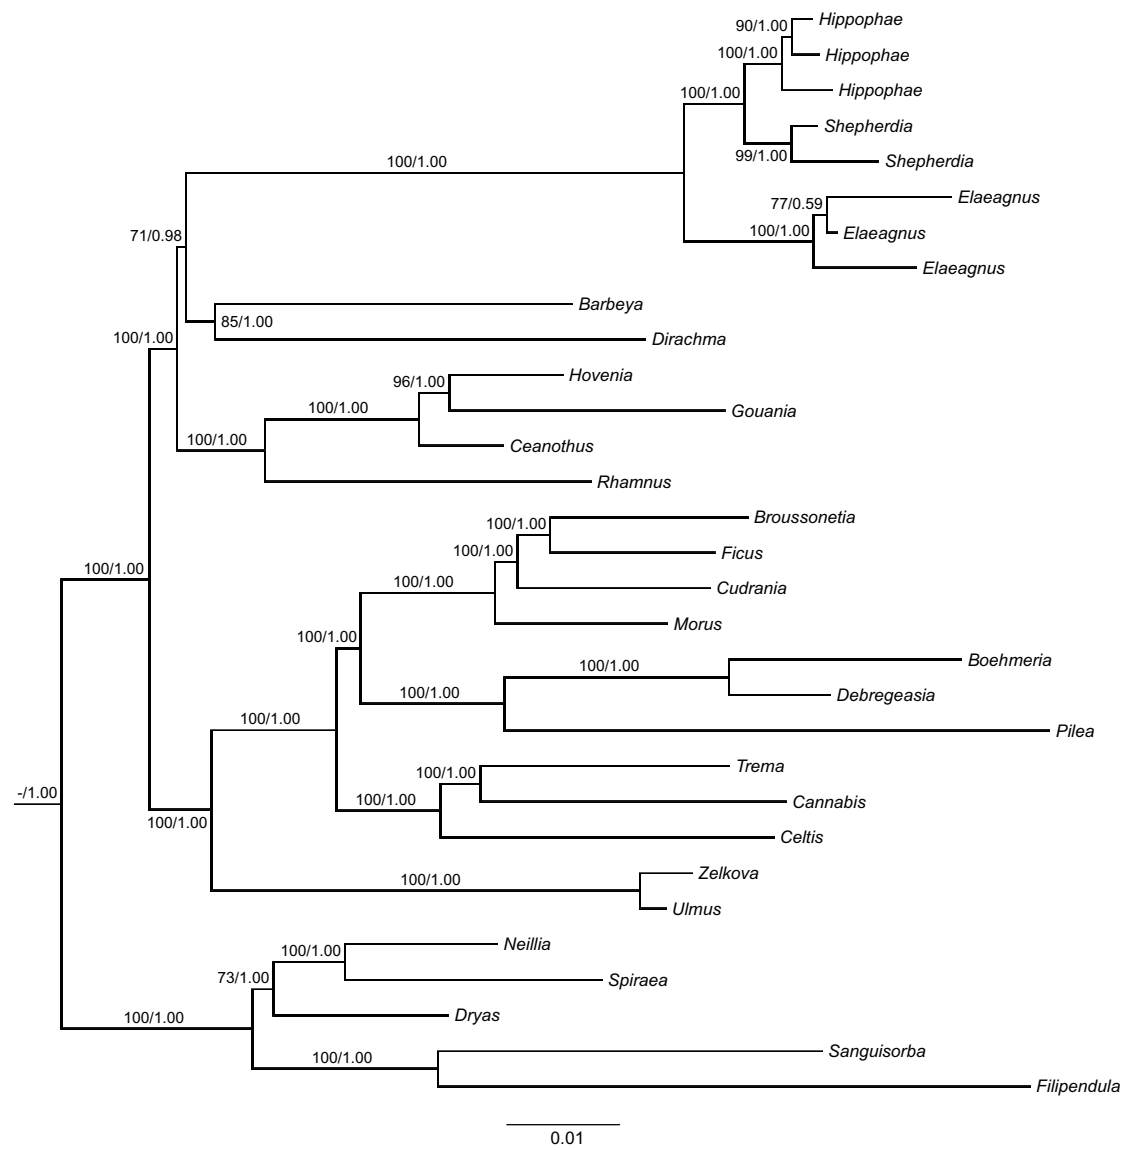

**Figure S1.** The ML tree of Rosales based on a data set consisting of 18335 aligned nucleotide sites for 13 gene partitions. Support values (ML Bootstrap/Bayesian posterior probability) are provided at nodes.

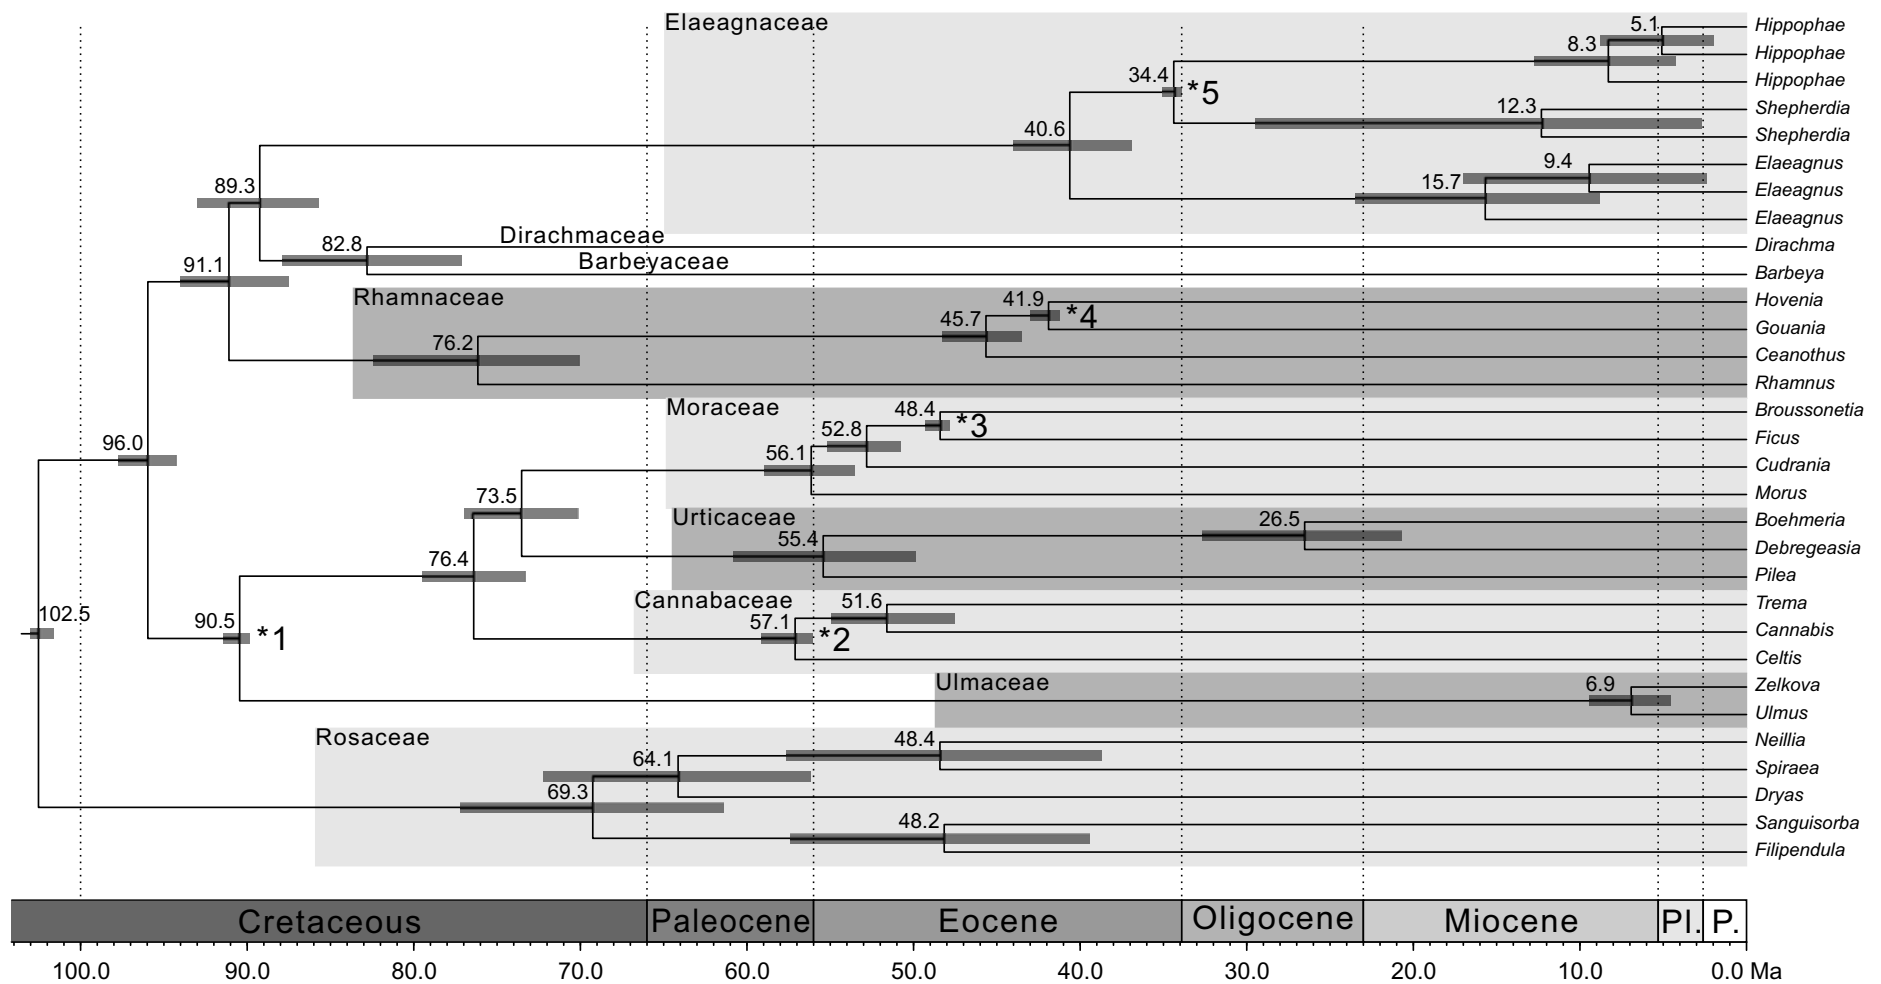

**Figure S2.** Chronogram of divergence times within Rosales derived from Bayesian relaxed clock analysis treating priors on fossils as being drawn from a lognormal distribution. Mean ages of nodes are shown, with horizontal dark grey bars indicating the 95% highest posterior density intervals. Fossil calibrations were used at nodes indicated with asterisks (see Table S4). Pl. = Pliocene; P. = Pleistocene.



## References

- Demesure, B., Sodzi, N., and Petit, R. (1995). A set of universal primers for amplification of polymorphic non-coding regions of mitochondrial and chloroplast DNA in plants. *Molecular Ecology* 4(1), 129-134.
- Hamilton, M.B. (1999). Four primer pairs for the amplification of chloroplast intergenic regions with intraspecific variation. *Molecular Ecology* 8(3), 521-523.
- Jia, D.R., Abbott, R.J., Liu, T.L., Mao, K.S., Bartish, I.V., and Liu, J.Q. (2012). Out of the Qinghai-Tibet Plateau: evidence for the origin and dispersal of Eurasian temperate plants from a phylogeographic study of *Hippophaë rhamnoides* (Elaeagnaceae). *New Phytologist* 194(4), 1123-1133.
- Lewis, C.E., and Doyle, J.J. (2001). Phylogenetic utility of the nuclear gene malate synthase in the palm family (Arecaceae). *Molecular Phylogenetics and Evolution* 19(3), 409-420.
- Li, M., Wunder, J., Bissoli, G., Scarponi, E., Gazzani, S., Barbaro, E., et al. (2008). Development of COS genes as universally amplifiable markers for phylogenetic reconstructions of closely related plant species. *Cladistics* 24(5), 727-745.
- Sauquet, H., Ho, S.Y., Gandolfo, M.A., Jordan, G.J., Wilf, P., Cantrill, D.J., et al. (2012). Testing the impact of calibration on molecular divergence times using a fossil-rich group: the case of *Nothofagus* (Fagales). *Systematic Biology* 61(2), 289-313.
- Shaw, J., Lickey, E.B., Beck, J.T., Farmer, S.B., Liu, W., Miller, J., et al. (2005). The tortoise and the hare II: relative utility of 21 noncoding chloroplast DNA sequences for phylogenetic analysis. *American Journal of Botany* 92(1), 142-166.
- Strand, A., Leebens-Mack, J., and Milligan, B. (1997). Nuclear DNA-based markers for plant evolutionary biology. *Molecular Ecology* 6(2), 113-118.
- Taberlet, P., Gielly, L., Pautou, G., and Bouvet, J. (1991). Universal primers for amplification of three non-coding regions of chloroplast DNA. *Plant Molecular Biology* 17(5), 1105-1109.
- Walker, J.D., Geissman, J.W., Bowring, S.A., and Babcock, L.E. (2012). *Geologic Time Scale v. 4.0: Geological Society of America*, doi: 10.1130/2012.CTS004R3C.
- White, T.J., Bruns, T., Lee, S., and Taylor, J.W. (1990). "Amplification and direct sequencing of fungal ribosomal RNA genes for phylogenetics," in *PCR Protocols: A Guide to Methods and Applications*, eds. M.A. Innis, D.H. Gelfand, J.J. Shinsky & T.J. White. (New York: Academic Press), 315-322.
